# Supplementary material for: Acute Kidney Injury Following Admission with Acute Coronary Syndrome: The Role of Diabetes Mellitus
Source: MDPI journal article supplement (doi:10.3390/jcm10214931), 2021-10-25
Supplement: s1 [file s1]

**Table S1.** Baseline Characteristics by AKI.

|                                                  | AKI               | No-AKI          | P      |
|--------------------------------------------------|-------------------|-----------------|--------|
| n                                                | 1,016             | 15,863          |        |
| <b>Baseline characteristics and demographics</b> |                   |                 |        |
| Age, years (median [IQR])                        | 75 (67, 82]       | 63 [54, 73]     | <0.001 |
| Gender (male)                                    | 710 (69.9)        | 12,328 (77.7)   | <0.001 |
| Higher education/ academic                       | 62 (26.5)         | 1393 (29.6)     | 0.35   |
| Marital status: married                          | 323 (65.5)        | 6628 (79.2)     | <0.001 |
| Dyslipidaemia                                    | 611 (60.4)        | 10357 (65.5)    | 0.001  |
| Hypertension                                     | 758 (74.7)        | 9277 (58.6)     | <0.001 |
| Current smokers                                  | 215 (21.4)        | 6088 (38.6)     | <0.001 |
| Diabetes mellitus                                | 513 (50.5)        | 5587 (35.2)     | <0.001 |
| Family history of CAD                            | 126 (13.8)        | 3946 (26.7)     | <0.001 |
| BMI (kg/m <sup>2</sup> ), (median [IQR])         | 26.6 [24.2, 29.4] | 27 [24.6, 30.1] | 0.008  |
| Prior MI                                         | 405 (40)          | 4870 (30.7)     | <0.001 |
| Prior CABG                                       | 157 (15.5)        | 1498 (9.5)      | <0.001 |
| Prior PCI                                        | 287 (28.4)        | 4478 (28.3)     | 0.97   |
| Chronic renal failure                            | 458 (45.1)        | 1374 (8.7)      | <0.001 |
| PVD                                              | 205 (20.2)        | 1188 (7.5)      | <0.001 |
| s/p CVA/TIA                                      | 146 (14.4)        | 1227 (7.8)      | <0.001 |
| History of CHF                                   | 233 (23)          | 1130 (7.1)      | <0.001 |
| Grace score>140                                  | 244 (46.9)        | 1207 (13.2)     | <0.001 |
| Earliest creatinine (mg/dL)<br>(median [IQR])    | 1.76 [1.4, 2.4]   | 1 [0.84, 1.2]   | <0.001 |
| <b>Medical therapy prior to admission</b>        |                   |                 |        |
| Aspirin                                          | 477 (56.2)        | 6544 (47.3)     | <0.001 |
| Clopidogrel                                      | 82 (9.7)          | 1274 (9.4)      | 0.772  |
| ACE-I                                            | 209 (38.1)        | 2954 (30.9)     | <0.001 |
| ARB                                              | 98 (18.1)         | 1118 (12.1)     | <0.001 |
| Beta blockers                                    | 388 (46.3)        | 4947 (36.7)     | <0.001 |
| Statins                                          | 400 (49.0)        | 6201 (47.3)     | 0.355  |
| Calcium channel blockers                         | 271 (32.9)        | 2718 (20.8)     | <0.001 |
| Nitrates                                         | 176 (21.6)        | 1355 (10.5)     | <0.001 |
| Hypoglycaemic agents                             | 262 (30.3)        | 3226 (22.7)     | <0.001 |
| Diuretics                                        | 261 (36.2)        | 1805 (16.2)     | <0.001 |
| <b>Coronary angiography and PCI</b>              |                   |                 |        |
| PCI                                              | 481 (47.3)        | 9827 (61.9)     | <0.001 |
| STEMI                                            | 458 (45.1)        | 7201 (45.4)     | 0.85   |
| Coronary angiography                             | 486 (69.4)        | 10,942 (88.2)   | <0.001 |
| <b>Medical therapy upon discharge</b>            |                   |                 |        |
| Aspirin                                          | 729 (81.7)        | 14,828 (95.1)   | <0.001 |
| P2Y12                                            | 499 (56.2)        | 11,427 (73.8)   | <0.001 |
| Statins                                          | 557 (62.9)        | 13,389 (86.5)   | <0.001 |
| ACE-I/ARB                                        | 478 (52.4)        | 11,551 (75.5)   | <0.001 |
| Beta blockers                                    | 547 (61.3)        | 12,326 (80.9)   | <0.001 |

**CHF:** congestive heart failure; **CAD:** coronary artery disease; **BMI:** body mass index; **MI:** myocardial infarction; **TIA:** transient ischemic attack; **CVA:** cerebrovascular attack; **ACE:** angiotensin converting enzyme; **ARB:** angiotensin receptor blockers, **PVD:** peripheral vascular (arterial) disease; **PCI:** percutaneous coronary interventional; **CABG:** coronary artery bypass graft surgery.

**Table S2.** multivariable model for prediction of AKI among ACS patients.

| <b>variable</b>       | <b>OR (95% CI)</b>   | <b><i>p</i></b>  |
|-----------------------|----------------------|------------------|
| Diabetes mellitus     | 1.40<br>(1.21, 1.61) | <i>p</i> < 0.001 |
| Age (per 5 years)     | 1.25<br>(1.20, 1.29) | <i>p</i> < 0.001 |
| Gender (male)         | 0.93<br>(0.80, 1.09) | <i>p</i> = 0.39  |
| Dyslipidaemia         | 0.67<br>(0.57, 0.77) | <i>p</i> < 0.001 |
| Hypertension          | 1.07<br>(0.91, 1.27) | <i>p</i> = 0.43  |
| Current smokers       | 0.95<br>(0.79, 1.13) | <i>p</i> = 0.55  |
| Family history of CAD | 0.84<br>(0.68, 1.03) | <i>p</i> = 0.10  |
| Prior CABG            | 0.94<br>(0.76, 1.15) | <i>p</i> = 0.54  |
| Prior PCI             | 0.77<br>(0.65, 0.90) | <i>p</i> = 0.002 |
| Chronic renal failure | 4.91<br>(4.20, 5.74) | <i>p</i> < 0.001 |
| Prior PVD             | 1.55<br>(1.29, 1.87) | <i>p</i> < 0.001 |
| Prior CVA/TIA         | 0.99<br>(0.81, 1.21) | <i>p</i> = 0.94  |
| History of CHF        | 1.57<br>(1.31, 1.89) | <i>p</i> < 0.001 |

**CHF:** congestive heart failure; **CAD:** coronary artery disease; **TIA:** transient ischemic attack; **CVA:** cerebrovascular attack; **PVD:** peripheral vascular (arterial) disease; **PCI:** percutaneous coronary interventional; **CABG:** coronary artery bypass graft surgery.

**Table S3.** Multivariable Model for Prediction of 1-year All-cause Mortality following ACS.

| <b>variable</b>       | <b>OR (95% CI)</b>   | <b><i>p</i></b>  |
|-----------------------|----------------------|------------------|
| AKI                   | 4<br>(3.39, 4.73)    | <i>p</i> < 0.001 |
| Diabetes mellitus     | 1.47<br>(1.31, 1.66) | <i>p</i> < 0.001 |
| Age (per 5 years)     | 1.3<br>(0.74, 0.93)  | <i>p</i> < 0.001 |
| Gender (male)         | 0.83<br>(0.80, 1.09) | <i>p</i> < 0.001 |
| Dyslipidaemia         | 0.63<br>(0.56, 0.70) | <i>p</i> < 0.001 |
| Hypertension          | 1.01<br>(0.89, 1.13) | <i>p</i> = 0.94  |
| Current smokers       | 1.12<br>(0.98, 1.28) | <i>p</i> = 0.1   |
| Family history of CAD | 0.69<br>(0.58, 0.82) | <i>p</i> < 0.001 |
| Prior CABG            | 0.96                 | <i>p</i> = 0.59  |

|                       |              |             |
|-----------------------|--------------|-------------|
|                       | (0.82, 1.12) |             |
| Prior PCI             | 0.82         | $p = 0.002$ |
|                       | (0.65, 0.90) |             |
| Chronic renal failure | 1.24         | $p = 0.001$ |
|                       | (1.09, 1.41) |             |
| Prior PVD             | 1.54         | $p < 0.001$ |
|                       | (1.35, 1.76) |             |
| Prior CVA/TIA         | 1.38         | $p < 0.001$ |
|                       | (1.20, 1.58) |             |
| History of CHF        | 1.66         | $p < 0.001$ |
|                       | (1.45, 1.89) |             |
| Interaction AKI* DM   | 0.83         | $p = 0.1$   |
|                       | (0.66, 1.03) |             |

**CHF:** congestive heart failure; **CAD:** coronary artery disease; **TIA:** transient ischemic attack; **CVA:** cerebrovascular attack; **PVD:** peripheral vascular (arterial) disease; **PCI:** percutaneous coronary interventional; **CABG:** coronary artery bypass graft surgery.

**Table S4.** Baseline Characteristics by DM.

|                                                  | No-DM                | DM                   | P      |
|--------------------------------------------------|----------------------|----------------------|--------|
| n                                                | 10,779               | 6,100                |        |
| <b>Baseline characteristics and demographics</b> |                      |                      |        |
| Age, years (median [IQR])                        | 61.00 [52.00, 73.00] | 66.00 [58.00, 75.00] | <0.001 |
| Gender (male)                                    | 8626 (80.0)          | 4412 (72.3)          | <0.001 |
| Higher education/ academic                       | 989 (33.0)           | 466 (24.0)           | <0.001 |
| Marital status: married                          | 4292 (78.5)          | 2659 (78.3)          | 0.809  |
| Dyslipidaemia                                    | 6299 (58.6)          | 4669 (76.8)          | <0.001 |
| Hypertension                                     | 5428 (50.4)          | 4607 (75.7)          | <0.001 |
| Current smokers                                  | 4501 (41.9)          | 1802 (29.8)          | <0.001 |
| Family history of CAD                            | 2807 (27.6)          | 1265 (23.1)          | <0.001 |
| BMI (kg/m <sup>2</sup> ), (median [IQR])         | 26.56 [24.28, 29.41] | 27.74 [25.25, 31.14] | <0.001 |
| Prior MI                                         | 2825 (26.2)          | 2450 (40.3)          | <0.001 |
| Prior CABG                                       | 785 (7.3)            | 870 (14.3)           | <0.001 |
| Prior PCI                                        | 2479 (23.0)          | 2286 (37.6)          | <0.001 |
| Chronic renal failure                            | 766 (7.1)            | 1066 (17.5)          | <0.001 |
| PVD                                              | 596 (5.5)            | 797 (13.1)           | <0.001 |
| s/p CVA/TIA                                      | 656 (6.1)            | 717 (11.8)           | <0.001 |
| History of CHF                                   | 583 ( 5.4)           | 780 (12.8)           | <0.001 |
| Grace score>140                                  | 692 (11.5)           | 759 (21.0)           | <0.001 |
| Earliest creatinine (mg/dL)<br>(median [IQR])    | 1.00 [0.86, 1.19]    | 1.03 [0.85, 1.38]    | <0.001 |
| <b>Medical therapy prior to admission</b>        |                      |                      |        |
| Aspirin                                          | 3623 (38.8)          | 3398 (63.6)          | <0.001 |
| Clopidogrel                                      | 622 ( 6.8)           | 734 (14.0)           | <0.001 |
| ACE-I                                            | 1468 (23.4)          | 1695 (44.2)          | <0.001 |
| ARB                                              | 524 ( 8.6)           | 692 (18.7)           | <0.001 |
| Beta blockers                                    | 2796 (30.8)          | 2539 (48.4)          | <0.001 |
| Statins                                          | 3394 (38.7)          | 3207 (62.3)          | <0.001 |
| Calcium channel blockers                         | 1484 (16.8)          | 1505 (29.7)          | <0.001 |
| Nitrates                                         | 748 (8.5)            | 783 (15.7)           | <0.001 |

|                                     |             |             |        |
|-------------------------------------|-------------|-------------|--------|
| Hypoglycaemic agents                | 36 (0.4)    | 3452 (62.5) | <0.001 |
| Diuretics                           | 919 (12.4)  | 1147 (26.1) | <0.001 |
| <b>Coronary angiography and PCI</b> |             |             |        |
| PCI                                 | 6868 (63.7) | 3440 (56.4) | <0.001 |
| STEMI                               | 2813 (63.1) | 1127 (55.1) | <0.001 |
| Coronary angiography                | 7298 (89.0) | 4130 (84.4) | <0.001 |

**CHF:** congestive heart failure; **CAD:** coronary artery disease; **BMI:** body mass index; **MI:** myocardial infarction; **TIA:** transient ischemic attack; **CVA:** cerebrovascular attack; **ACE:** angiotensin converting enzyme; **ARB:** angiotensin receptor blockers; **PVD:** peripheral vascular (arterial) disease; **PCI:** percutaneous coronary interventional; **CABG:** coronary artery bypass graft surgery.

**Figure S1.** Multivariable Analysis for Prediction of 1-year Mortality according to DM Status.

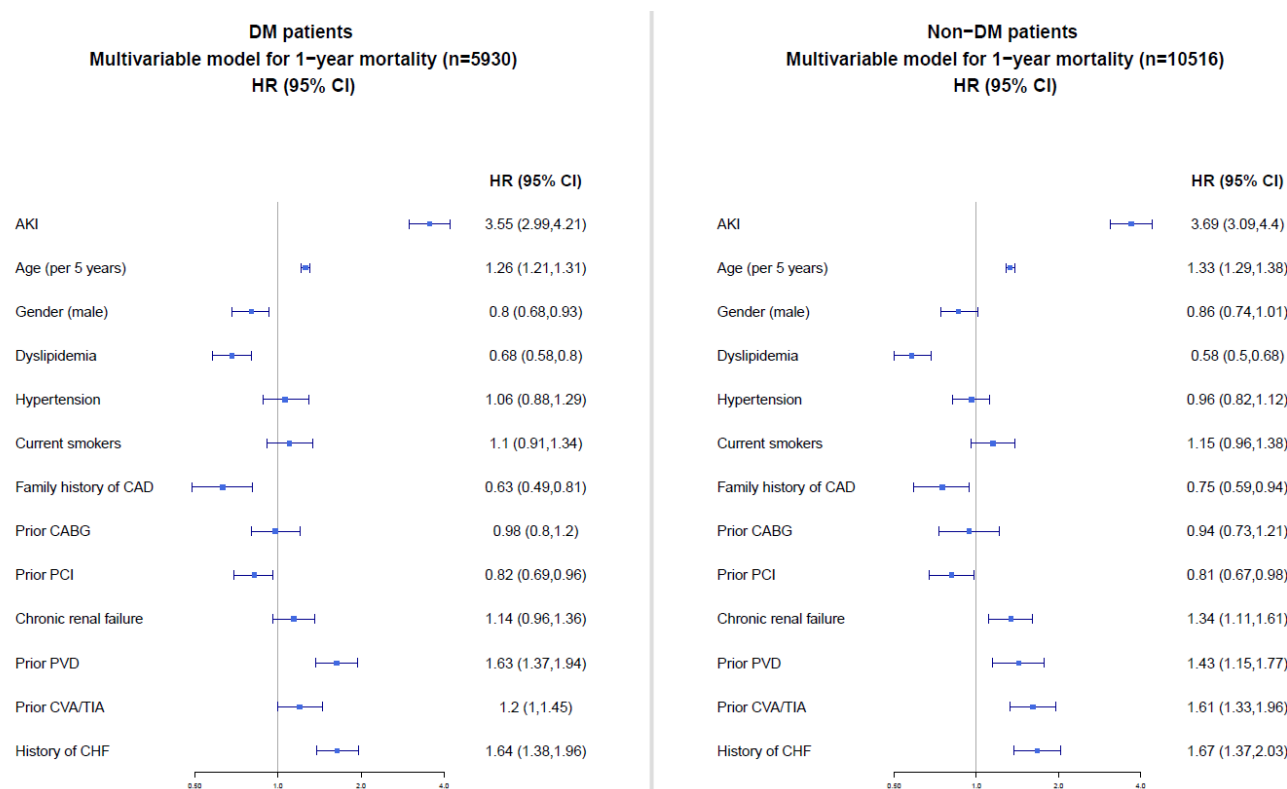

**CHF:** congestive heart failure; **CAD:** coronary artery disease; **TIA:** transient ischemic attack; **CVA:** cerebrovascular attack; **PVD:** peripheral vascular (arterial) disease; **PCI:** percutaneous coronary interventional; **CABG:** coronary artery bypass graft surgery.
